# Supplementary material for: HPV16 infection decreases vaccine-induced HPV16 antibody avidity: the CVT trial
Source: PubMed Central journal article supplement (PMC8964739; doi:10.1038/s41541-022-00431-x), 2022-03-29
Supplement: 41541_2022_431_MOESM1_ESM.pdf [file 41541_2022_431_MOESM1_ESM.pdf]

## **HPV16 Infection Decreases Vaccine-Induced HPV16 Antibodies: The CVT trial**

Tsang et al.

**Supplementary information**

**Supplementary Table 1. Characteristics of 1-dose and 3-dose participants in the subset selected for avidity tested and compared to the full cohort.**

| Characteristics                                                           | 1-dose   |      |     |      | 3-dose   |      |      |      |
|---------------------------------------------------------------------------|----------|------|-----|------|----------|------|------|------|
|                                                                           | Selected |      | All |      | Selected |      | All  |      |
|                                                                           | N        | %    | N   | %    | N        | %    | N    | %    |
| Age at enrollment                                                         |          |      |     |      |          |      |      |      |
| 18-21                                                                     | 112      | 56.6 | 163 | 59.3 | 181      | 56.4 | 1679 | 56.6 |
| 22-25                                                                     | 86       | 43.4 | 112 | 40.7 | 140      | 43.6 | 1285 | 43.4 |
| HPV16 serostatus at first HPV vaccination                                 |          |      |     |      |          |      |      |      |
| Positive                                                                  | 57       | 28.8 | 72  | 26.7 | 80       | 24.9 | 741  | 25.3 |
| Negative                                                                  | 141      | 71.2 | 198 | 73.3 | 241      | 75.1 | 2185 | 74.7 |
| HPV18 serostatus at first HPV vaccination                                 |          |      |     |      |          |      |      |      |
| Positive                                                                  | 51       | 26.3 | 66  | 24.6 | 76       | 24.3 | 694  | 23.9 |
| Negative                                                                  | 143      | 73.7 | 202 | 75.4 | 237      | 75.7 | 2205 | 76.1 |
| HPV DNA status at first HPV vaccination                                   |          |      |     |      |          |      |      |      |
| HPV16/18 positive                                                         | 26       | 13.2 | 31  | 11.3 | 16       | 5.0  | 223  | 7.5  |
| Any HPV positive                                                          | 70       | 35.5 | 93  | 33.9 | 97       | 30.5 | 916  | 31.0 |
| HPV negative                                                              | 101      | 51.3 | 150 | 54.7 | 205      | 64.5 | 1819 | 61.5 |
| Number of follow-up visits attended (not including clinical mgmt. visits) |          |      |     |      |          |      |      |      |
| 0-1                                                                       | 0        | 0.0  | 57  | 20.7 | 0        | 0.0  | 111  | 3.7  |
| 2-3                                                                       | 44       | 22.2 | 55  | 20.0 | 8        | 2.5  | 265  | 8.9  |
| 4-5                                                                       | 54       | 27.3 | 61  | 22.2 | 54       | 16.8 | 680  | 22.9 |
| 6-7                                                                       | 100      | 50.5 | 102 | 37.1 | 259      | 80.7 | 1908 | 64.4 |
| Number of follow-up visits that yielded a sample for avidity testing      |          |      |     |      |          |      |      |      |
| 0-1                                                                       | 0        | 0.0  |     |      | 0        | 0.0  |      |      |
| 2-3                                                                       | 91       | 46.0 |     |      | 184      | 57.3 |      |      |
| 4-5                                                                       | 76       | 38.4 |     |      | 90       | 28.0 |      |      |
| 6-7                                                                       | 31       | 15.7 |     |      | 47       | 14.6 |      |      |
| Body mass index, BMI                                                      |          |      |     |      |          |      |      |      |
| Underweight (<18.5 kg/m <sup>2</sup> )                                    | 11       | 5.6  | 18  | 6.5  | 25       | 7.8  | 215  | 7.3  |
| Normal weight (18.5-24.9 kg/m <sup>2</sup> )                              | 109      | 55.1 | 164 | 59.6 | 171      | 53.3 | 1681 | 56.7 |
| Overweight (25-29.9 kg/m <sup>2</sup> )                                   | 52       | 26.3 | 65  | 23.6 | 66       | 20.6 | 648  | 21.9 |
| Obese (>= 30 kg/m <sup>2</sup> )                                          | 26       | 13.1 | 28  | 10.2 | 59       | 18.4 | 420  | 14.2 |

### Supplementary methods. Change in Avidity Over Time: Individual-Level Heterogeneity

In our cohort, the Geometric Mean Avidity (GMA) remained relatively constant between years 2 and 11. However, this could result from (i) avidity levels in all participants remaining relatively constant over time or (ii) avidity levels increasing in some participants but decreasing in other participants (i.e. heterogeneity). As described next, we found little evidence to support the presence of significant heterogeneity.

We first show the “spaghetti plots” of avidity levels (Supplementary Figure 3). Each line in the plot shows the avidity levels for a given participant over time. We note that most lines are relatively flat. We next calculated participant level slopes ( $\hat{\beta}_i$ ) for individuals with at least 4 measurements spanning at least 5 years. We obtained the participant’s slopes by regressing a participant’s log-avidity levels on study year using data from years 3 to 11. As the spaghetti plots indicated, most slopes were close to 0 (Supplementary Figures 4, 5). Finally, we allowed for subject-specific random effects of the time coefficient in our regression models. We fit the mixed model:  $\log(Y_{ijk}) = \gamma_0 + \gamma_t T_{ij} + \gamma_{0i} + \gamma_{ti} T_{ij} + \epsilon_{ij} + e_{ijk}$ , where  $i$  indexes participant,  $j$  indexes measurement,  $k$  indexes replicate (i.e. some samples were run twice),  $T_{ij}$  is the study year,  $Y_{ijk}$  is the avidity level, and the random effects are  $\gamma_{0i} \sim N(0, \sigma_0^2)$ ,  $\gamma_{ti} \sim N(0, \sigma_t^2)$ ,  $\epsilon_{ij} \sim N(0, \sigma_\epsilon^2)$ , and  $e_{ijk} \sim N(0, \sigma_e^2)$ . Again, we found that  $\sigma_t$  was small compared to  $\sigma_\epsilon$  or  $\sigma_0$  (see Supplementary Table 4), suggesting that the effect of time (i.e.  $\gamma_t + \gamma_{ti}$ ) varied little across participants. Coupled with  $\gamma_t \approx 0$ , avidity levels were relatively constant over time for all subjects.

**(a) 1-dose**

1-dose & Seronegative (Group 1)

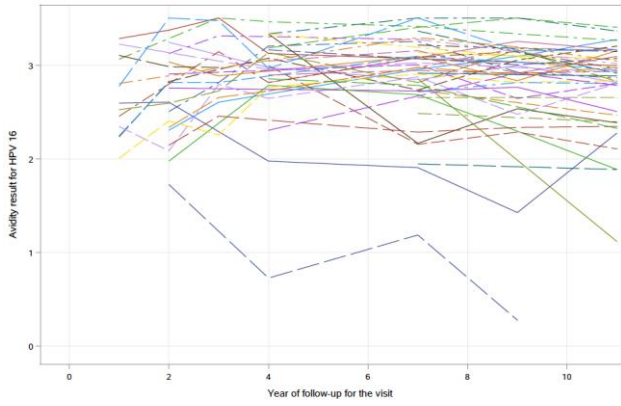

1-dose & Seronegative (Group 2)

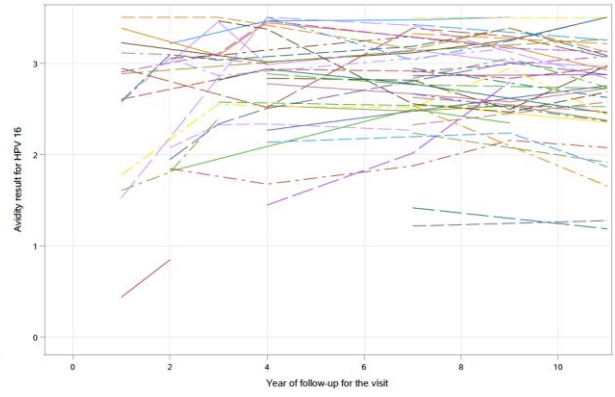

1-dose & Seronegative (Group 3)

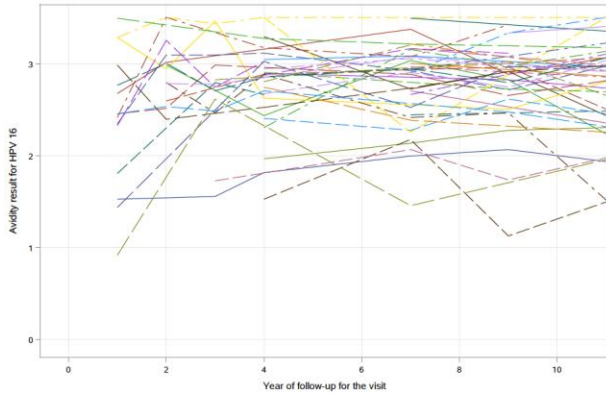

1-dose & Seropositive

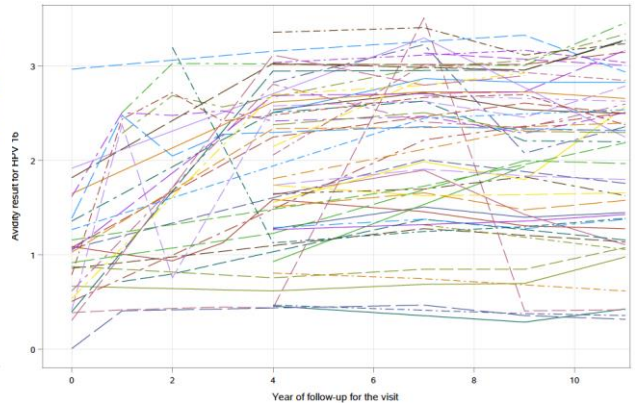

**(b) 3-dose**

3-dose & Seronegative (Group 1)

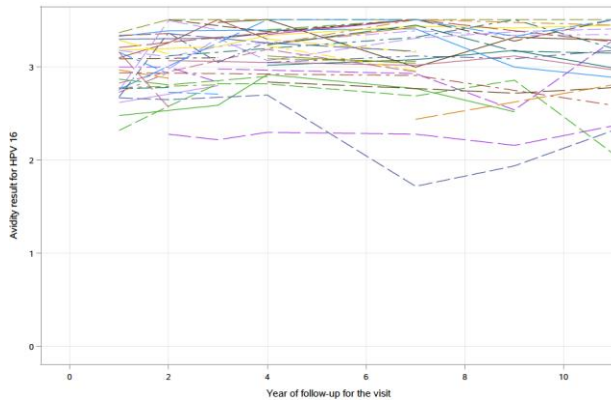

3-dose & Seronegative (Group 2)

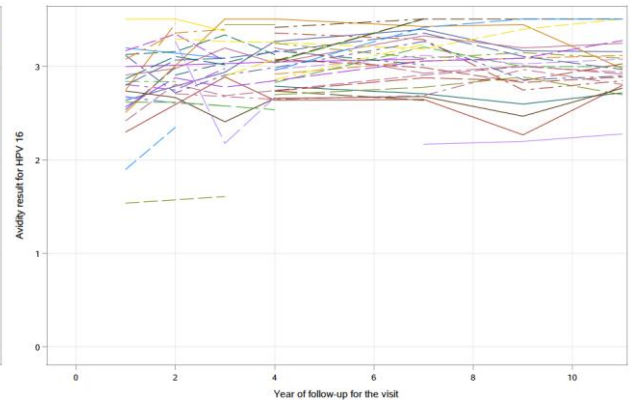

3-dose & Seronegative (Group 3)

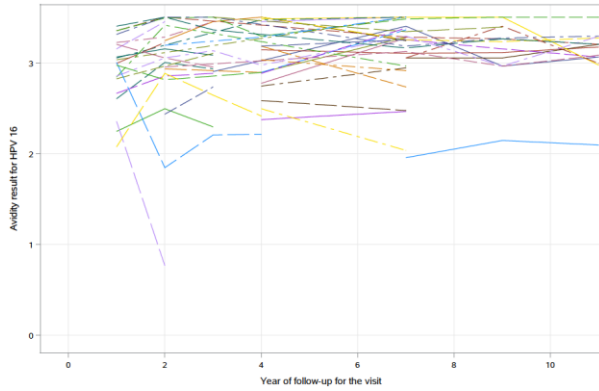

3-dose & Seronegative (Group 4)

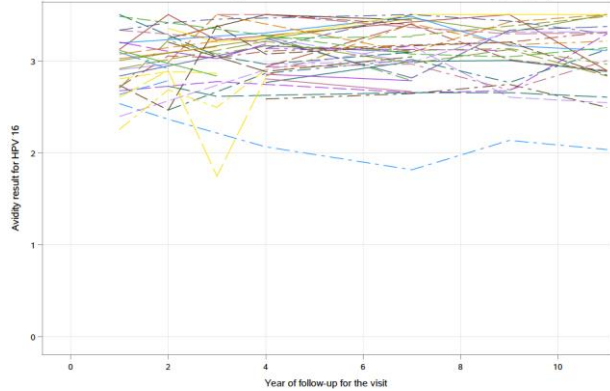

3-dose & Seronegative (Group 5)

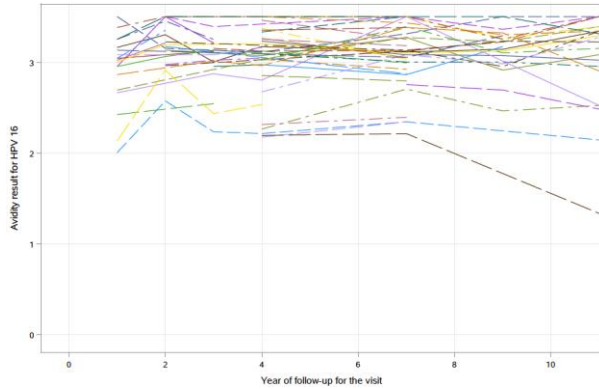

3-dose & Seropositive (Group 1)

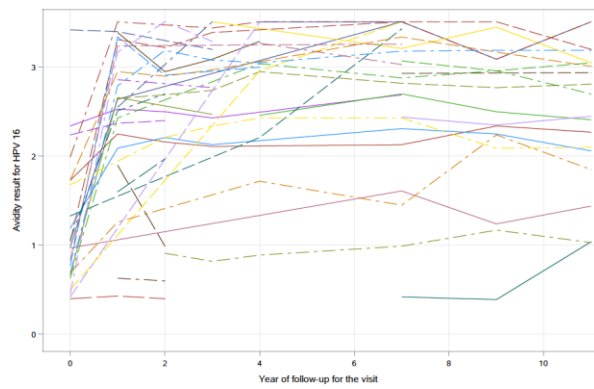

3-dose & Seropositive (Group 2)

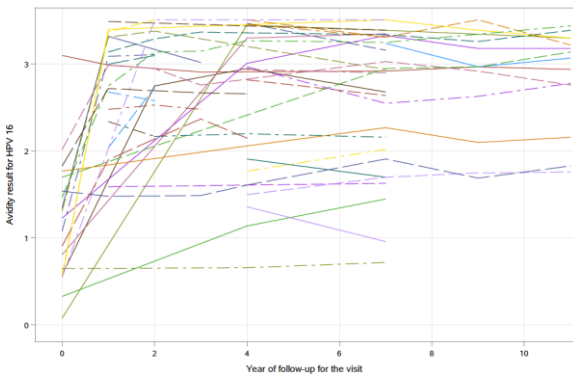

**Supplementary Figure 1. Spaghetti Plots.** Each line shows one participant's avidity levels over time by vaccine dose [(a) 1-dose and (b) 3-dose]. Subjects are categorized by number of vaccine doses received and baseline HPV-16 serology. Individuals in each category were randomly split into multiple groups for ease of display.

**1-dose & Seronegative**

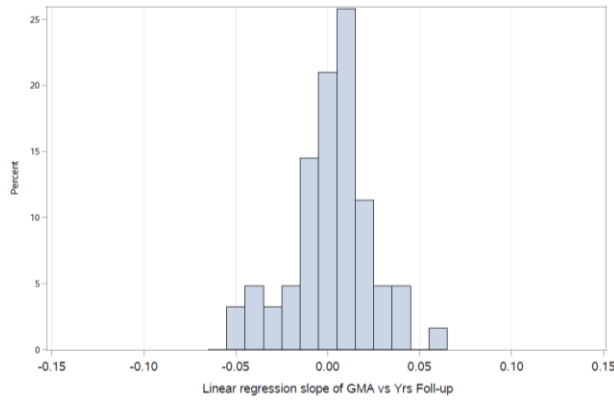

**1-dose & Seropositive**

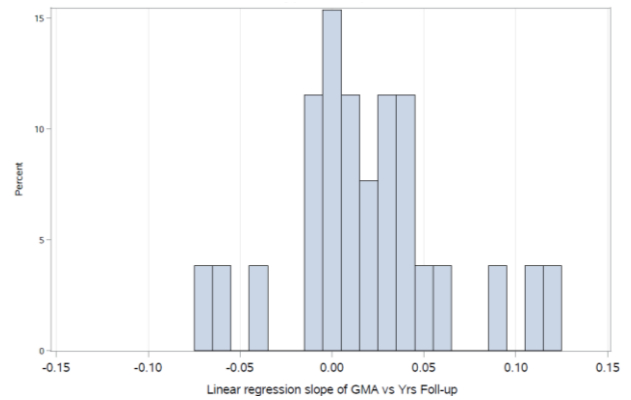

**3-dose & Seronegative**

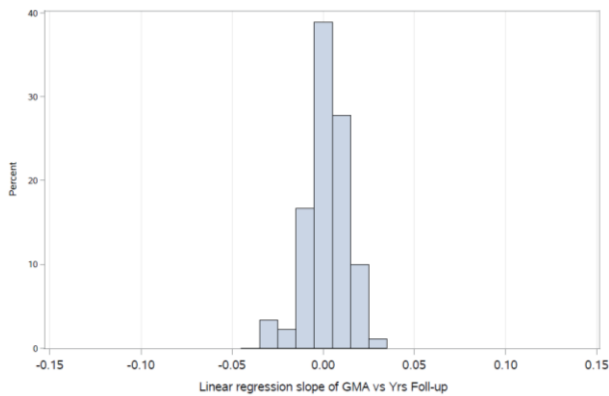

**3-dose & Seropositive**

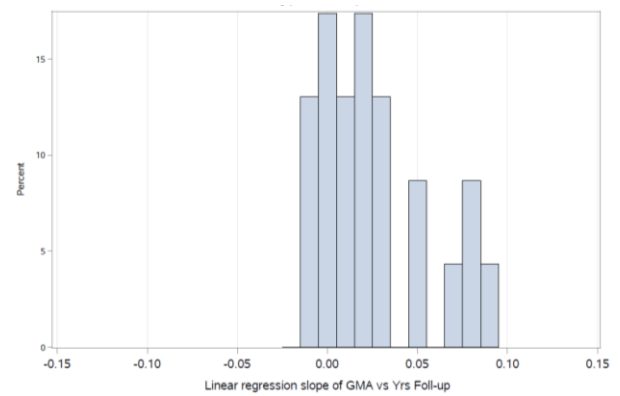

**Supplementary Figure 2. Histogram of participant level slopes.** The figures show the distribution of slopes between  $\hat{\beta}_i = -0.05$  and  $\hat{\beta}_i = 0.05$ . Subjects are categorized by number of vaccines received and baseline HPV-16 serology. For outliers, please see supplementary figure 5.

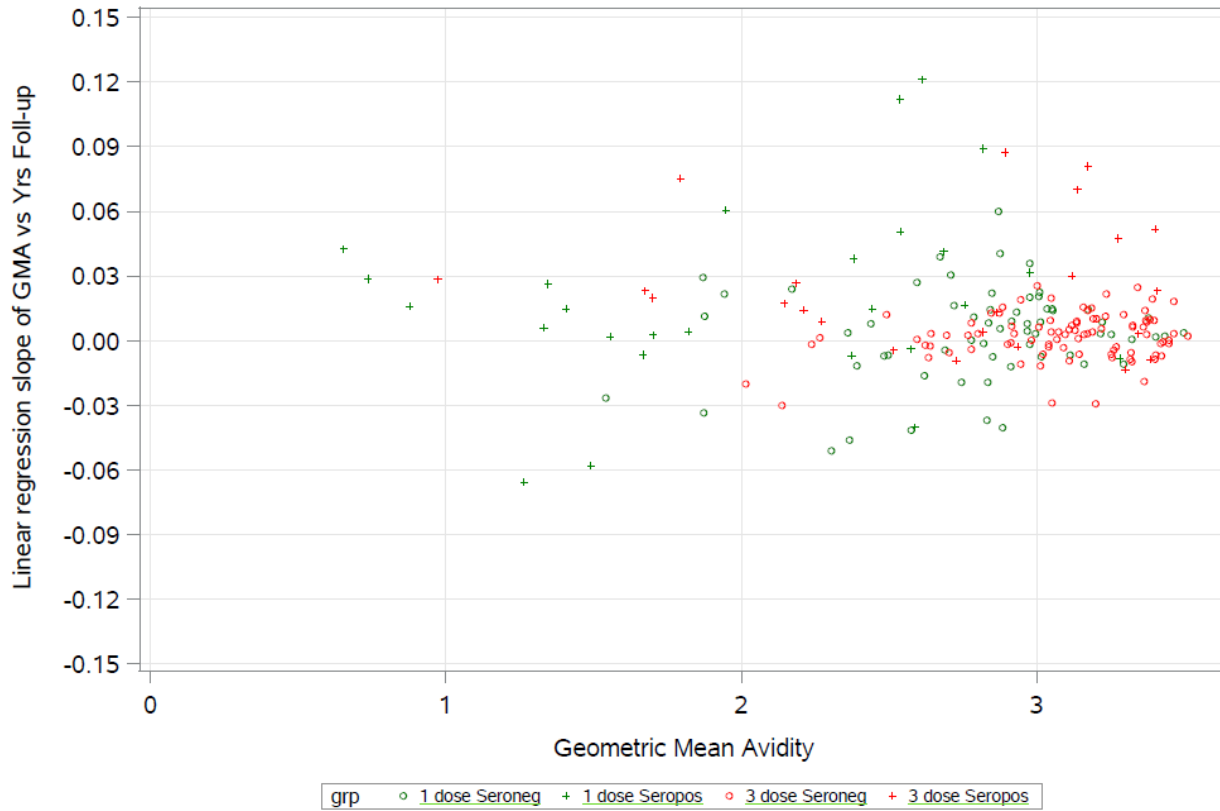

**Supplementary Figure 3. Avidity levels.** Plot of participants' mean avidity level (x-axis) vs participants' slopes (y-axis). The color indicates the number of HPV vaccine doses and the symbol indicates the baseline HPV-16 serology status.

**Supplementary Table 2. Parameter estimates from linear mixed models.**

| #<br>DOSES | Baseline<br>Serology | $\gamma_0$   | $\gamma_t$       | $\sigma_0^2$ | $\sigma_t^2$ | $\sigma_\epsilon^2$ |
|------------|----------------------|--------------|------------------|--------------|--------------|---------------------|
| 1          | +                    | 0.56 (0.078) | 0.0066 (0.0056)  | 0.23         | 0            | 0.041               |
| 1          | -                    | 1.04 (0.021) | -0.0043 (0.0023) | 0.023        | 0.00015      | 0.011               |
| 3          | +                    | 0.92 (0.059) | 0.0033 (0.0027)  | 0.21         | 0.000036     | 0.0084              |
| 3          | -                    | 1.10 (0.010) | 0.00020 (0.0012) | 0.012        | 0.000042     | 0.00096             |

The first two columns define the cohort, while the remaining columns show the estimated parameters.

Standard errors for fixed effects are provided in parentheses.



**Supplementary Table 3. Correlation between antibody level and avidity among 1-dose and 3-dose participants who were HPV16 seronegative or seropositive at first HPV vaccination.**

| Year of followup      | 1-dose                       |                                | 3-dose                         |                                 |
|-----------------------|------------------------------|--------------------------------|--------------------------------|---------------------------------|
|                       | Seronegative<br>PCC (95% CI) | Seropositive †<br>PCC (95% CI) | Seronegative ‡<br>PCC (95% CI) | Seropositive ‡‡<br>PCC (95% CI) |
| First HPV vaccination | N/A                          | -0.15 (-0.87- 0.58)            | N/A                            | 0.33 (-0.08- 0.73)              |
| Year 1                | 0.27 (-0.04- 0.59)           | -0.47 (-1.07- 0.13)            | 0.20 ( 0.04- 0.35)             | 0.26 ( 0.10- 0.42)              |
| Year 2                | 0.15 (-0.14- 0.45)           | 0.13 (-0.38- 0.64)             | 0.11 (-0.10- 0.33)             | 0.51 ( 0.04- 0.97)              |
| Year 3                | 0.02 (-0.27- 0.30)           | -0.28 (-0.96- 0.41)            | 0.14 (-0.03- 0.30)             | 0.27 (-0.18- 0.73)              |
| Year 4                | -0.06 (-0.24- 0.12)          | -0.08 (-0.50- 0.33)            | 0.28 ( 0.10- 0.45)             | 0.00 (-0.35- 0.35)              |
| Year 7                | 0.13 (-0.04- 0.30)           | -0.06 (-0.33- 0.20)            | 0.22 ( 0.06- 0.38)             | 0.05 (-0.17- 0.27)              |
| Year 9                | -0.10 (-0.27- 0.07)          | -0.01 (-0.34- 0.31)            | 0.23 ( 0.04- 0.43)             | 0.14 (-0.13- 0.40)              |
| Year 11               | -0.13 (-0.38- 0.12)          | 0.05 (-0.20- 0.31)             | 0.37 ( 0.07- 0.68)             | 0.30 (-0.05- 0.65)              |
| <b>Overall</b>        | <b>0.04 (-0.10- 0.18)</b>    | <b>0.08 (-0.09- 0.26)</b>      | <b>0.14 ( 0.01- 0.27)</b>      | <b>0.44 ( 0.31- 0.57)</b>       |

PCC, Pearson correlation coefficient; CI, confidence intervals; N/A, not applicable

† 19 ELISA results missing

‡ 11 ELISA results missing from Year 2

‡‡ 22 ELISA results missing from first HPV vaccination, 9 ELISA results missing from Year 2

**a) 1-dose women who were seronegative at first HPV vaccination**

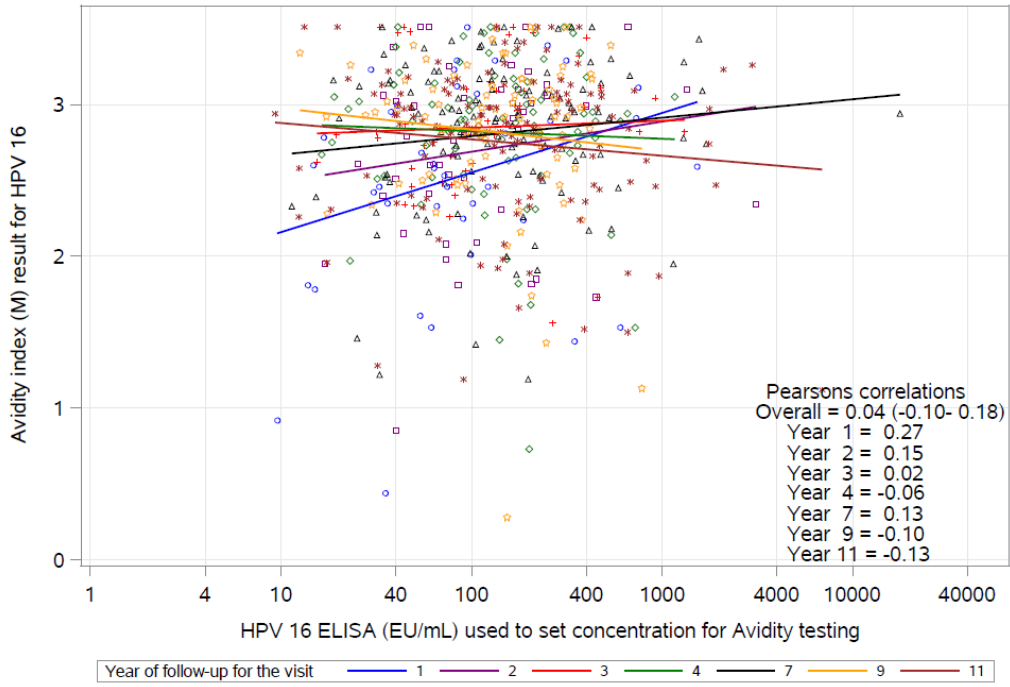

**b) 3-dose women who were seronegative at first HPV vaccination**

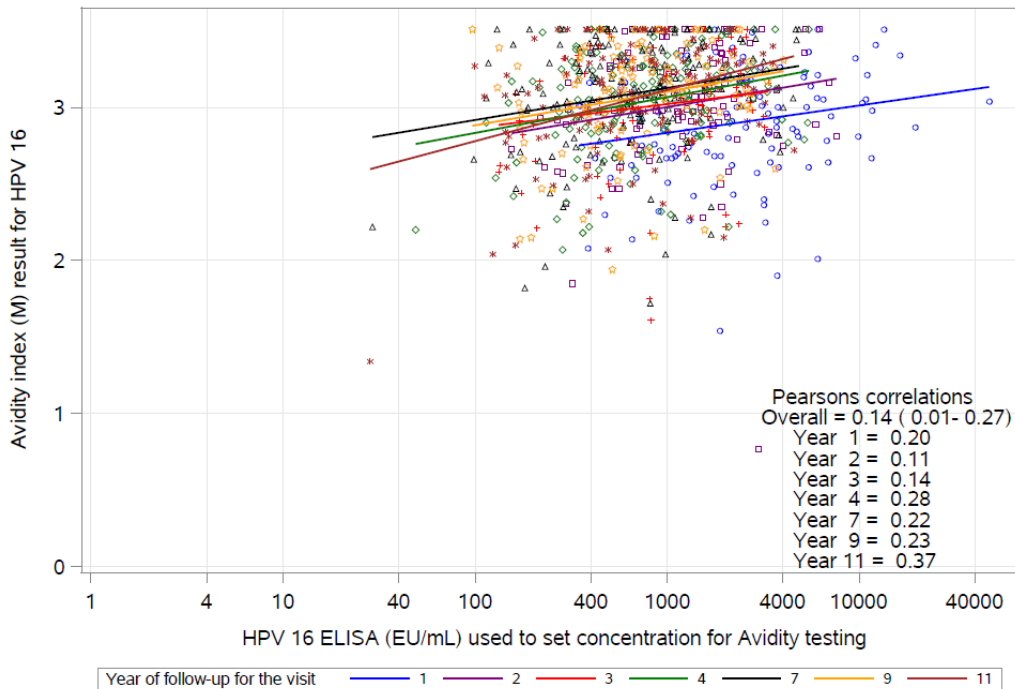

**Supplementary Figure 4. Correlation between antibody level and avidity by vaccine dose.** Antibody levels measured by ELISA. **a** 1-dose women who were seronegative at first HPV vaccination. **b** 3-dose women who were seronegative at first HPV vaccination.

**a) 1-dose women who were seropositive at first HPV vaccination**

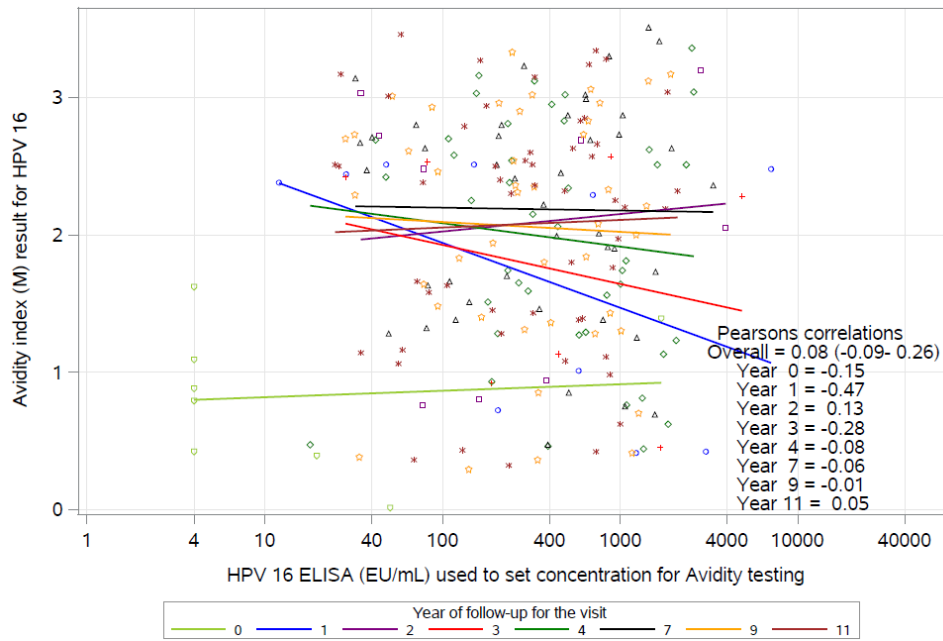

**b) 3-dose women who were seropositive at first HPV vaccination**

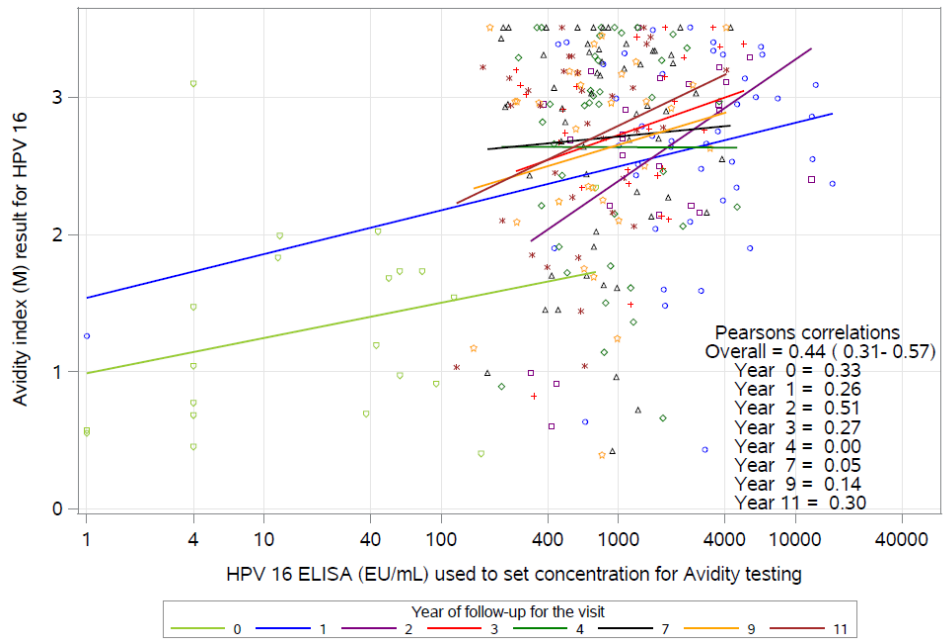

**Supplementary Figure 5. Correlation between antibody level (measured by ELISA) and avidity by vaccine dose.** Antibody levels measured by ELISA. **a** 1-dose women who were seropositive at first HPV vaccination. **b** 3-dose women who were seropositive at first HPV vaccination.
